# Supplementary material
Source: Springer Nature journal article supplement (https://www.springermedizin.de/resource/supplementary/12903_2013_365_MOESM1_ESM.pdf/9516830)
Supplement: MOESM1 [file 9516830]

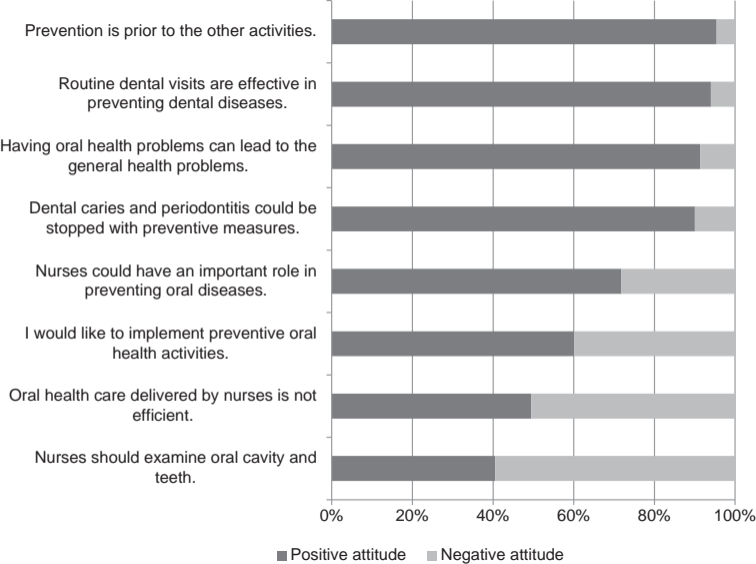

Prevention is prior to the other activities.

Routine dental visits are effective in preventing dental diseases.

Having oral health problems can lead to the general health problems.

Dental caries and periodontitis could be stopped with preventive measures.

Nurses could have an important role in preventing oral diseases.

I would like to implement preventive oral health activities.

Oral health care delivered by nurses is not efficient.

Nurses should examine oral cavity and teeth.

0% 20% 40% 60% 80% 100%

■ Positive attitude ■ Negative attitude
